32 **Abstract:**

33

34 **Introduction:** Rapid organism identification (ID) and antimicrobial susceptibility testing  
35 (AST) along with antibiotic stewardship (ASP) are critical to appropriate treatment. We  
36 sought to capture time for bacterial culture and initiation of appropriate therapy for  
37 patients, from 2017 (without MALDI-TOF/Vitek 2 and ASP) and 2018 (with MALDI-  
38 TOF/Vitek 2 and ASP).

39 **Methods:** Eligible patients admitted to our hospital with a positive sputum, blood, or  
40 urine culture. Sequential patients were retrospectively obtained from March 1 to May 31,  
41 2017. Seventy-seven patients from 2017 were compared to 77 patients from 2018. A  
42 time-in-motion study was performed to compare time to identification (ID), AST results,  
43 and ASP team intervention for the two periods. Data were entered into SPSS (ver 25)  
44 for analysis. Results are reported as mean ( $\pm$  SD) or percentage.

45 **Results:** Time to organism ID was significantly faster in 2018 (2018  $24.9 \pm 14.4$ , 2017  
46  $33.8 \pm 17$  h,  $p=0.001$ ). Time to AST results was also significantly faster for patients in  
47 2018 compared to 2017 ( $18.2 \pm 14$  compared to  $28.5 \pm 14.9$  h,  $p<0.001$ ). ASP team  
48 recommended significantly more adjustments to empiric antimicrobial therapy in 2018  
49 (28% of 2018 vs. 2% in 2017,  $p< 0.001$ ). Length of hospital stay was significantly  
50 shorter in 2018 compared to 2017 (2018  $10.7 \pm 11.1$  days and 2017  $15.5 \pm 18.1$  days,  
51  $p=0.05$ ).

52 **Conclusions:** Use of MALDI-TOF/Vitek 2 leads to an average 21.5 h faster ID and AST  
53 results that can be acted upon by ASP for appropriate antimicrobial recommendations.

54

55

56

57  
58           Bacterial infections in the healthcare associated setting cause significant  
59 morbidity and mortality, especially when initial treatment is sub-optimal. This has been  
60 clearly demonstrated especially for Gram-negative bloodstream infections (BSIs).(1)  
61 Early effective antimicrobial therapy has demonstrated reductions in mortality in patients  
62 with sepsis.(2) With antibiotic resistance on the rise, especially in gram-negative bacilli,  
63 it is becoming increasingly difficult for clinicians to select the most optimal empiric  
64 antibiotic therapy.<sup>(3)</sup>

65           Laboratory diagnosis of infections is typically dependent on routine culture and  
66 phenotypic identification utilizing Gram stain and analysis of biochemical reactions,  
67 along with antimicrobial susceptibility testing (AST).(4) Rapid diagnostic tests that allow  
68 for earlier identification of pathogens, and in some situations, early identification of  
69 resistance patterns, have been shown to reduce time to attaining optimal antibiotic  
70 therapy(5-9). Additionally, with the combination of antimicrobial stewardship  
71 intervention, these tests have demonstrated a reduced mortality benefit(9, 10). While  
72 these tests have enhanced the management of BSIs, the use of MALDI-TOF and Vitek  
73 2 for organism identification and AST along with ASP more generally was of interest to  
74 explore.

75           CHI Health Nebraska is a 14-hospital health system made up of critical access  
76 hospitals (5), community-based hospitals (8) and one academic medical center (400  
77 beds) affiliated with Creighton University Health Science Schools (nursing, medicine,  
78 pharmacy, physical and occupational therapy). Recent acquisition of a matrix assisted  
79 laser desorption/ionization time-of-flight (MALDI-TOF) for organism identification and  
80 Vitek 2 for AST in the centralized microbiology laboratory for all CHI Health hospitals

81 has led us to propose this quasi-experimental time-in-motion study design to determine  
82 the effect on patient hospitalization outcome. The primary objective was to determine,  
83 using a time-in-motion study design, the effect of integrated use of MALDI-TOF/Vitek 2  
84 and ASP for patients with urine, respiratory (based on sputum culture), or BSI at the  
85 academic hospital of CHI Health.

86  
87 **Methods:**

88  
89 Microbiology. For both time periods, routine cultures of urine, sputum, and blood were  
90 performed using standard techniques. For blood cultures, the BACTEC system was  
91 used. For the 2017 time period, organism ID and AST were performed primarily using  
92 the MicroScan microdilution system performed according to manufacturer's instructions.  
93 MALDI-TOF/Vitek 2 (bioMerieux, Inc. St. Louis, MO) became available for general use  
94 for organism ID (MALDI-TOF) and AST (Vitek 2) in March 2018 after significant  
95 verification procedures were completed. Microbiological workflow was similar to Huang  
96 AM, et al.(6) except we are reporting MALDI-TOF and Vitek 2 AST from urine, blood,  
97 and sputum cultures after subculture to solid media and incubated overnight.  
98 Additionally, workflow was adjusted to take maximum advantage of the faster  
99 turnaround time for ID and AST in that cultures were continuously examined soon after  
100 a minimum of 18 hours of incubation after specimen inoculation with growth of potential  
101 pathogens processed on the MALDI-TOF and Vitek 2 as soon as possible afterwards.  
102 Results were then reported as they became available immediately after they were  
103 verified which occurred from 6:30AM to the end of staffing (11PM weekdays and 5PM  
104 weekends). Thus, there were two groups in the study; the control group (2017 time  
105 period) and the experimental group (2018 time period). Consecutive patients from both

106 time periods (2017 and 2018) were eligible when one culture type was positive (i.e.  
107 urine culture positive without blood culture positive) for urine and sputum cultures. BSI  
108 could have more than one site with positive isolates.

109 Antimicrobial Stewardship. For the 2017 time period (control group), limited ASP was  
110 available from staff pharmacists without dedicated ASP personnel. Staff pharmacists  
111 were expected to make interventions as part of their normal workflow. In 2018,  
112 dedicated ASP personnel were hired providing robust ASP for all CHI Health hospitals  
113 (0.5 FTE ID physician and 2.5 FTE ASP pharmacist) and they replaced staff  
114 pharmacist's interventions. All ASP pharmacists monitored patients through TheraDoc  
115 and consulted the ID clinician for all antimicrobial recommendations. ASP pharmacists  
116 were available during normal work hours (8-4:30) and made recommendations on  
117 patients receiving empiric therapy with carbapenems, daptomycin, double coverage,  
118 (double anaerobic coverage), all *C. difficile* positive patients, and all *S. aureus*  
119 bacteremias. Since both ASP infectious diseases physician and pharmacists made  
120 antimicrobial recommendations to primary care physicians (PCPs), other types of  
121 recommendations were suggested including ID consult, TEE, and length of therapy as  
122 examples. Both years utilized Biofire BCID (Biofire Diagnostics, Salt Lake City, UT) for  
123 rapid detection system on all positive blood cultures. However, in 2018 laboratory  
124 technicians increased their daily time frame when Biofire was reported for positive blood  
125 cultures (7 am-10 pm). All Biofire results were paged to ASP team. The ASP  
126 pharmacist kept the Biofire pager (7-5) and then handed it off to the on-call ID fellow  
127 overnight and weekends. In 2017, Biofire results were reported during normal laboratory  
128 hours (7 am – 5 pm) and were reviewed by the staff pharmacists as part of an inbasket

129 work queue in EPIC. ASP pharmacists were available five days/week and used  
130 TheraDoc (TheraDoc ver 4.7, Hospira, Lake Forest, IL) for clinical decision support  
131 software. ASP pharmacists documented their intervention in EPIC as a progress note.  
132 Staff pharmacists as part of their normal duties performed weekend coverage. To  
133 summarize, in 2017 (control group) rapid diagnostic testing (Biofire) was used for  
134 positive blood cultures only and the Microscan instrument was used for urine and  
135 sputum results without ASP team intervention. In 2018, Biofire was used for positive  
136 blood cultures and called to ASP team and MALDI-TOF/Vitek 2 was used for urine and  
137 sputum cultures and not called to the ASP team once positive.

138         Consent was not required because the standard of care was evaluated for quality  
139 assurance purposes. The control group (March-April 2017) identified adult patients ( $\geq$   
140 19 years of age) with blood, urine, or sputum culture obtained and reported while  
141 hospitalized. Charlson comorbidity index was used for parity between 2017 and 2018  
142 data(11).

143 Exclusion criteria. Patients who were transferred into the hospital from an outside  
144 hospital and were empirically treated for a bacterial infection or sepsis, patients  
145 transitioned to comfort care or hospice within the first 72 h of antimicrobial therapy,  
146 patients who expired prior to identification of the organism, and contaminant cultures  
147 and patients empirically placed in isolation for “rule-out” mycobacterial pneumonia.

148 Statistical Analysis. Dichotomous data were analyzed using Chi-square or Fisher’s  
149 exact test. Continuous, normally distributed data were analyzed by Student t-test.  
150 Continuous, non-normally distributed data were analyzed using Mann Whitney U test.  
151 Data were collected from EPIC and entered into Statistical Package for the Social

152 Sciences (SPSS, ver. 25, IBM, NY). Data will be presented as percentages or mean  $\pm$   
153 standard deviation (SD).

154

155 Results:

156 In the control group (2017), a total of 77 patients (27 blood isolates, 25 sputum,  
157 and 25 urine isolates) were retrospectively enrolled between March-May 2017. In the  
158 MALDI-TOF/Vitek 2 group, a total of 77 patients (28 blood isolates, 24 sputum, and 25  
159 urine isolates) were concurrently enrolled in the same time frame in 2018. Mean ( $\pm$  SD)  
160 patient age and Charlson Comorbidity Index (CCI) were not different between the two  
161 groups (Table 1). Additionally, patients were admitted to the intensive care unit 31% in  
162 2017 and 32% in 2018, respectively. Microorganisms isolated included 10 (6.5%) that  
163 were polymicrobial and the remaining were monomicrobial isolates. The most common  
164 single isolate included *E. coli* (30%), methicillin-sensitive *S. aureus* (MSSA) (9%), *S.*  
165 *pneumoniae* (8%), and *P. aeruginosa* (7%). There were no significant differences in the  
166 number of isolates in the study from 2017 compared to 2018. The most common sites  
167 of infection from patients in both years included urine (69, 45%), lung (55, 38%), and  
168 skin (10, 6.5%).

169 In 2018, with the addition of MALDI-TOF/Vitek 2 results available, ASP team  
170 intervened significantly more often for patients' empiric antimicrobial therapy compared  
171 to 2017 (2018 29%, 2017 2%,  $p < 0.001$ ). The most common intervention was to  
172 change empiric therapy (59%). In 2018, the ASP team made empiric antibiotic  
173 recommendations. In bacteremic patients, ASP team changed empiric antimicrobial  
174 therapy in 19 of 28 (68%). For patients with positive sputum cultures, the ASP team

175 recommended to increase antimicrobial dose in 15 of 24 (62.5%). In patients with  
176 positive urine cultures, the majority (84%) did not require a change in empiric therapy.  
177 Additionally, time from the AST results to pharmacists making antimicrobial  
178 recommendations averaged  $0.13 \pm 1.5$  h compared to  $0.24 \pm 0.74$  h in 2017. However,  
179 hospital staff pharmacists made 2 ASP recommendations in 2017 and ASP team made  
180 22 study recommendations in 2018. All but one ASP recommendations were accepted  
181 in 2018.

182         The time-in-motion data collection for culture ID and AST determination  
183 demonstrated significant results comparing 2017 without ASP or MALDI-TOF/Vitek 2  
184 and 2018 with ASP and MALDI-TOF/Vitek 2 (Table 2). The time to receive the  
185 specimen in the Microbiology Laboratory for both 2017 and 2018 averaged  
186 approximately 5 h. Additionally, time from laboratory receipt of specimen until Gram-  
187 stain results averaged 15 h in both 2017 and 2018. However, organism identification  
188 was significantly faster averaging 10 h sooner and AST results were available 10 h  
189 sooner for MALDI-TOF/Vitek 2 patients compared to 2017 without these instruments.  
190 Total time for ASP team to make empiric antimicrobial changes averaged 84 h in 2017  
191 and 62.5 h in 2018, a 21.5 h difference.

192         Length of hospitalization (LOS) ( $10.7 \pm 11.1$  d vs.  $15.5 \pm 18.1$  d,  $p=0.05$ ) and  
193 length of in-patient antimicrobial therapy ( $6.7 \pm 3.8$  d vs.  $8.8 \pm 7.8$  d,  $p=0.036$ ) were  
194 significantly shorter for the ASP and MALDI-TOF/Vitek 2 group. Of interest, the LOS  
195 differences between the two groups was most dramatic in ICU, averaging 7 days  
196 shorter for patients in the ASP and MALDI-TOF/Vitek 2 group, ( $p<0.001$ ) whereas  
197 patients admitted to the general medicine floor averaged 4 d shorter in the ASP and



198 MALDI-TOF/Vitek 2 group. Finally, we sought to determine which variables were  
199 associated with LOS using a stepwise linear regression analysis. Variables that were  
200 significant by univariate analysis were entered into the linear regression analysis to  
201 determine variables that significantly correlated with LOS. After the stepwise  
202 procedure, one variable was included in the model, length of in-patient antimicrobial  
203 (Table 3). This significant variable captured 31% of the LOS variation ( $p < 0.0001$ ).

204

205 Discussion:

206       The use of rapid diagnostic testing including MALDI-TOF and Vitek 2 AST has  
207 been proven to reduce time to organism identification. However, the incorporation of  
208 the ASP team along with rapid isolate identification and AST allows rapid interpretation  
209 of the results communicated to the primary care physician to make changes in  
210 antimicrobial therapy. Huang AM, et al. and Perez and colleagues both conducted pre-  
211 post quasi-experimental studies integrating MALDI-TOF organism identification plus  
212 ASP intervention, but limited to either BSIs, or Gram-negative bacteremias,  
213 respectively(6, 7). Huang, et al. enrolled 245 patients into an intervention group using  
214 MALDI-TOF and ASP and 256 patients into a preintervention group for bacteremias. In  
215 their study, length of ICU stay averaged 6 d shorter for the intervention group. Perez  
216 and colleagues enrolled 153 patients with antibiotic resistant Gram-negative  
217 bacteremias as the control group and 112 patients in the intervention group. Their LOS  
218 differences averaged 6 d longer for the control group overall with the ICU LOS  
219 averaging 5.3 d longer. These studies are consistent with the current study, which  
220 demonstrated that, with shorter turnaround time for ID and AST using optimized

221 microbiology workflow and MALDI-TOF and Vitek 2, combined with a vigorous ASP, a  
222 significant reduction in LOS was achieved. Our previous de-escalation study confirms  
223 these results that shorter LOS is more exaggerated for ICU patients(12). Wenzler and  
224 colleagues reported use of MALDI-TOF and ASP for pneumonia or bacteremia caused  
225 by *A. baumannii*. Their results demonstrated the combination reduced time to effective  
226 therapy by 41 h and was associated with an increased clinical cure for those patients.  
227 Bookstaver et al. combined rapid diagnostic testing using Biofire BCID and ASP as a  
228 bundle for their quasi-experimental cohort of Gram-negative bloodstream infections in  
229 their multihospital health system(13). These investigators enrolled 830 patients into a  
230 preintervention group and 333 patients into a postintervention group with Gram-negative  
231 bacteremias. Their results demonstrated significant reductions in median time to de-  
232 escalate combination antimicrobials and initiation of more appropriate empiric  
233 antimicrobial therapy (before AST results were known). These investigators found  
234 significant reductions in median time to de-escalate combination antimicrobials and  
235 more appropriate empiric antimicrobial therapy (before AST results were known). Taken  
236 together along with the results of these studies, implementation of this process  
237 throughout our 14-hospital health-system with centralized Microbiology Laboratory  
238 would show a significant benefit to the care of infected patients now that there are more  
239 ASP pharmacists (3 covering CHI Health) and an ID physician with 0.5 FTE devoted to  
240 ASP across all hospitals in the health system.

241           However, there are limits associated with this study. A lack of patient  
242 randomization in the quasi-experimental study may not take into account changes in  
243 standard of care from the previous year, which could impact LOS. To our knowledge,

244 both years incorporated Biofire BCID and there were no significant changes in standard  
245 of care except the introduction of the ASP team to make antimicrobial  
246 recommendations. The study periods were selected to minimize bias associated with  
247 medical residents and fellows at our academic medical center. This study excluded  
248 patients transferred into our regional hospital so all antimicrobials administration times  
249 were in-hospital times and not from administrations prior to admission. The effect of  
250 ASP was not directly identified in the stepwise multiple regression analysis. However,  
251 length of antimicrobials was identified as the primary factor associated with LOS, and  
252 ASP team did have an impact on this variable. By making appropriate antimicrobial  
253 recommendations, the ASP team impacted length of therapy and indirectly (probably)  
254 impacted LOS. It would be of interest to repeat this study from all CHI Health hospitals  
255 in Nebraska to determine the effect of ASP team and MALDI-TOF/Vitek 2 would have  
256 on these community hospitals in addition to this report since the centralized laboratory  
257 receives these specimens as far away as Kearney, NE (186 miles).

258 In conclusion, use of ASP and MALDI-TOF/Vitek 2 rapid identification and AST  
259 demonstrated for urine, blood, and sputum cultures a significant reduction in time to  
260 isolate identification and AST results, which translated to significant reduction in  
261 antibiotic length of therapy and hospital LOS.

262

263  
264  
265  
266  
267  
268  
269  
270  
271  
272  
273  
274  
275  
276  
277  
278  
279  
280  
281  
282  
283  
284  
285  
286  
287

References:

1. **Wisplinghoff H, Bischoff T, Tallent SM, Seifert H, Wenzel RP, Edmond MB.** 2004. Nosocomial bloodstream infections in US hospitals: analysis of 24,179 cases from a prospective nationwide surveillance study. *Clin Infect Dis* **39**:309-317.
2. **Kumar A, Roberts D, Wood KE, Light B, Parrillo JE, Sharma S, Suppes R, Feinstein D, Zanotti S, Taiberg L, Gurka D, Kumar A, Cheang M.** 2006. Duration of hypotension before initiation of effective antimicrobial therapy is the critical determinant of survival in human septic shock. *Crit Care Med* **34**:1589-1596.
3. **Kang CI, Kim SH, Park WB, Lee KD, Kim HB, Kim EC, Oh MD, Choe KW.** 2005. Bloodstream infections caused by antibiotic-resistant gram-negative bacilli: risk factors for mortality and impact of inappropriate initial antimicrobial therapy on outcome. *Antimicrob Agents Chemother* **49**:760-766.
4. **Dixon P, Davies P, Hollingworth W, Stoddart M, MacGowan A.** 2015. A systematic review of matrix-assisted laser desorption/ionisation time-of-flight mass spectrometry compared to routine microbiological methods for the time taken to identify microbial organisms from positive blood cultures. *Eur J Clin Microbiol Infect Dis* **34**:863-876.
5. **Bork JT, Leekha S, Heil EL, Zhao L, Badamas R, Johnson JK.** 2015. Rapid testing using the Verigene Gram-negative blood culture nucleic acid test in combination with antimicrobial stewardship intervention against Gram-negative bacteremia. *Antimicrob Agents Chemother* **59**:1588-1595.
6. **Huang AM, Newton D, Kunapuli A, Gandhi TN, Washer LL, Isip J, Collins CD, Nagel JL.** 2013. Impact of rapid organism identification via matrix-assisted laser

- 288 desorption/ionization time-of-flight combined with antimicrobial stewardship team  
289 intervention in adult patients with bacteremia and candidemia. Clin Infect Dis  
290 **57**:1237-1245.
- 291 7. **Perez KK, Olsen RJ, Musick WL, Cernoch PL, Davis JR, Land GA, Peterson LE,**  
292 **Musser JM.** 2013. Integrating rapid pathogen identification and antimicrobial  
293 stewardship significantly decreases hospital costs. Arch Pathol Lab Med **137**:1247-  
294 1254.
- 295 8. **Sothoron C, Ferreira J, Guzman N, Aldridge P, McCarter YS, Jankowski CA.** 2015.  
296 A Stewardship Approach To Optimize Antimicrobial Therapy through Use of a Rapid  
297 Microarray Assay on Blood Cultures Positive for Gram-Negative Bacteria. J Clin  
298 Microbiol **53**:3627-3629.
- 299 9. **Suzuki H, Hitomi S, Yaguchi Y, Tamai K, Ueda A, Kamata K, Tokuda Y,**  
300 **Koganemaru H, Kurihara Y, Ishikawa H, Yanagisawa H, Yanagihara K.** 2015.  
301 Prospective intervention study with a microarray-based, multiplexed, automated  
302 molecular diagnosis instrument (Verigene system) for the rapid diagnosis of  
303 bloodstream infections, and its impact on the clinical outcomes. J Infect Chemother  
304 **21**:849-856.
- 305 10. **Timbrook TT, Morton JB, McConeghy KW, Caffrey AR, Mylonakis E, LaPlante**  
306 **KL.** 2017. The Effect of Molecular Rapid Diagnostic Testing on Clinical Outcomes in  
307 Bloodstream Infections: A Systematic Review and Meta-analysis. Clin Infect Dis  
308 **64**:15-23.
- 309 11. **Charlson M, Szatrowski TP, Peterson J, Gold J.** 1994. Validation of a combined  
310 comorbidity index. J Clin Epidemiol **47**:1245-1251.

- 311 12. **Knaak EC, SM; Elsasser, GN; Gonitzke, A; Preheim, LC; Destache, CJ.** 2013. Does  
312 antibiotic de-escalation for nosocomial pneumonia impact intensive care unit length  
313 of stay? *Inf Dis Clin Pract* **21**:172-176.
- 314 13. **Bookstaver PB, Nimmich EB, Smith TJ, 3rd, Justo JA, Kohn J, Hammer KL,**  
315 **Troficanto C, Albrecht HA, Al-Hasan MN.** 2017. Cumulative Effect of an  
316 Antimicrobial Stewardship and Rapid Diagnostic Testing Bundle on Early  
317 Streamlining of Antimicrobial Therapy in Gram-Negative Bloodstream Infections.  
318 *Antimicrob Agents Chemother* **61**.
- 319  
320  
321  
322

323  
324  
325

Table 1. Demographics of Study Patients

| Variable             | 2017 (without ASP + MALDI-TOF/Vitek 2) | 2018 (with ASP + MALDI-TOF/Vitek 2) |
|----------------------|----------------------------------------|-------------------------------------|
| Age (yrs)            | 68.2 ± 15.3                            | 65.8 ± 18.5                         |
| CCI                  | 3.5 ± 2.2                              | 3.6 ± 2.3                           |
| Percent female (%)   | 56                                     | 51                                  |
| Admitted to ICU (%)  | 31                                     | 32                                  |
| Isolates from:       |                                        |                                     |
| Blood culture (n)    | 27                                     | 28                                  |
| Sputum culture (n)   | 25                                     | 24                                  |
| Urine culture (n)    | 25                                     | 25                                  |
| Blood cultures:      |                                        |                                     |
| Candida spp          | 0                                      | 2                                   |
| <i>E. coli</i>       | 6                                      | 8                                   |
| Enterococcus spp     | 3                                      | 0                                   |
| Enterobacter spp.    | 1                                      | 0                                   |
| Klebsiella spp.      | 3                                      | 1                                   |
| MRSA                 | 2                                      | 1                                   |
| MSSA                 | 3                                      | 5                                   |
| <i>S. pneumoniae</i> | 3                                      | 3                                   |
| Proteus spp.         | 1                                      | 1                                   |
| Serratia spp.        | 1                                      | 0                                   |

|                        |    |    |
|------------------------|----|----|
| Streptococcus spp.     | 1  | 6  |
| VRE                    | 0  | 1  |
| Polymicrobial isolates | 3  | 0  |
| Sputum cultures:       |    |    |
| Acinetobacter spp.     | 0  | 1  |
| Citrobacter spp.       | 0  | 1  |
| <i>E. coli</i>         | 0  | 1  |
| Klebsiella spp.        | 2  | 2  |
| <i>H. influenzae</i>   | 1  | 2  |
| <i>M. catarrhalis</i>  | 0  | 3  |
| MRSA                   | 1  | 2  |
| Polymicrobial isolates | 3  | 0  |
| Urine cultures:        |    |    |
| Aerococcus             | 0  | 1  |
| Candida spp.           | 1  | 0  |
| <i>E. cloacae</i>      | 1  | 0  |
| <i>E. coli</i>         | 17 | 14 |
| Klebsiella spp.        | 1  | 3  |
| <i>S. pneumoniae</i>   | 1  | 0  |
| Proteus spp.           | 1  | 6  |
| Pseudomonas spp.       | 1  | 0  |
| Stenotrophomonas spp.  | 1  | 0  |



326 CCI = Charlson comorbidity index; ICU = intensive care unit; MRSA = methicillin  
 327 resistant *S. aureus*; MSSA = methicillin sensitive *S. aureus*

328  
 329 Table 2. Time Parameters to Identify Organism and Obtain AST  
 330

| Time Variable                    | 2017 (without ASP + MALDI-TOF/Vitek 2) | 2018 (with ASP + MALDI-TOF/Vitek 2) | Statistical significance |
|----------------------------------|----------------------------------------|-------------------------------------|--------------------------|
| Culture transport time (h)       | 5.9 ± 6                                | 4.7 ± 4.8                           | P > 0.05                 |
| Gram stain report time (h)       | 15.9 ± 14.2                            | 14.9 ± 10.4                         | P > 0.05                 |
| Identify and report organism (h) | 33.8 ± 17                              | 24.9 ± 14.4                         | P = 0.001                |
| Perform and report AST (h)       | 28.5 ± 14.9                            | 18.2 ± 14                           | P < 0.001                |

331 AST = antimicrobial susceptibility testing; ASP = antimicrobial stewardship program

332  
 333  
 334  
 335

Table 3. Length of Hospitalization Regression Analysis

| Independent Variable            | Hospitalization Length Coefficients (95% CI) |
|---------------------------------|----------------------------------------------|
| Constant                        | -0.78 (-5.24; 3.69)                          |
| Length of antimicrobial therapy | 1.64 (1.05; 2.24)                            |
| Variables excluded:             | Beta In:                                     |
| MALDI-TOF time                  | 0.12                                         |
| Traditional ID time             | 0.052                                        |

|           |      |
|-----------|------|
| Mortality | 0.12 |
|-----------|------|

336 CI = confidence interval
